# Supplementary material for: Transcriptome assembly and microarray construction for Enchytraeus crypticus, a model oligochaete to assess stress response mechanisms derived from soil conditions
Source: PubMed Central journal article supplement (PMC4234436; doi:10.1186/1471-2164-15-302), 2014-04-23

**A**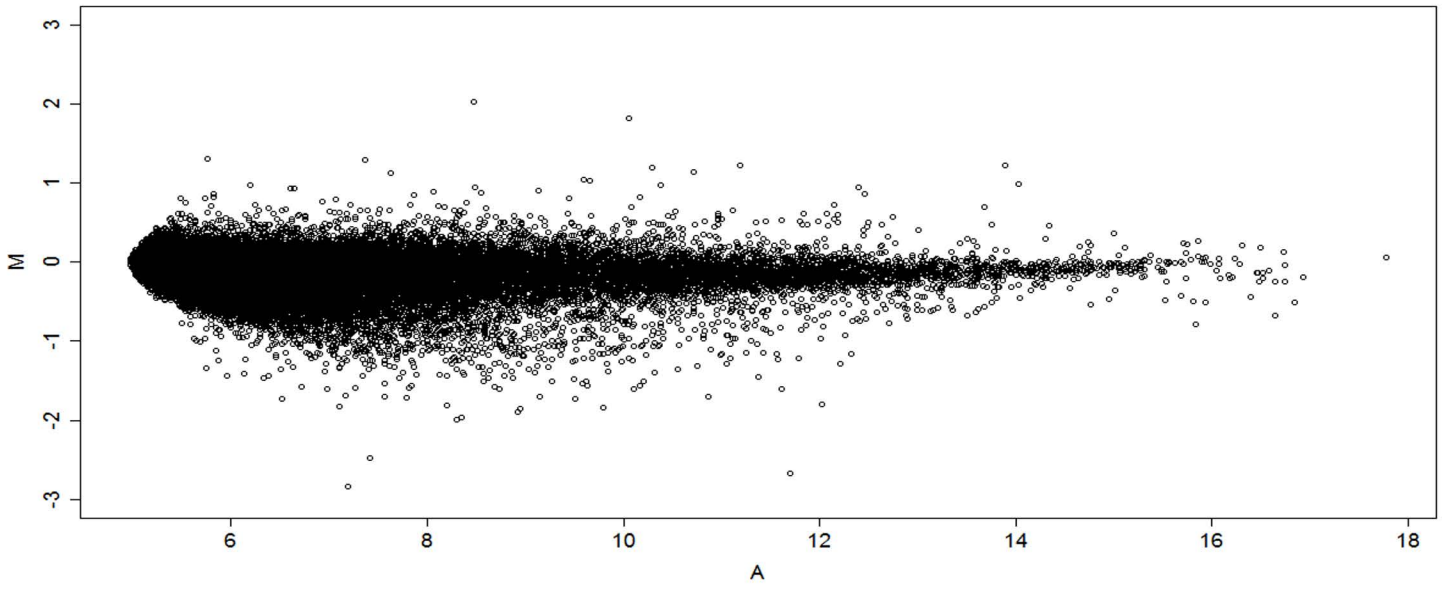**B**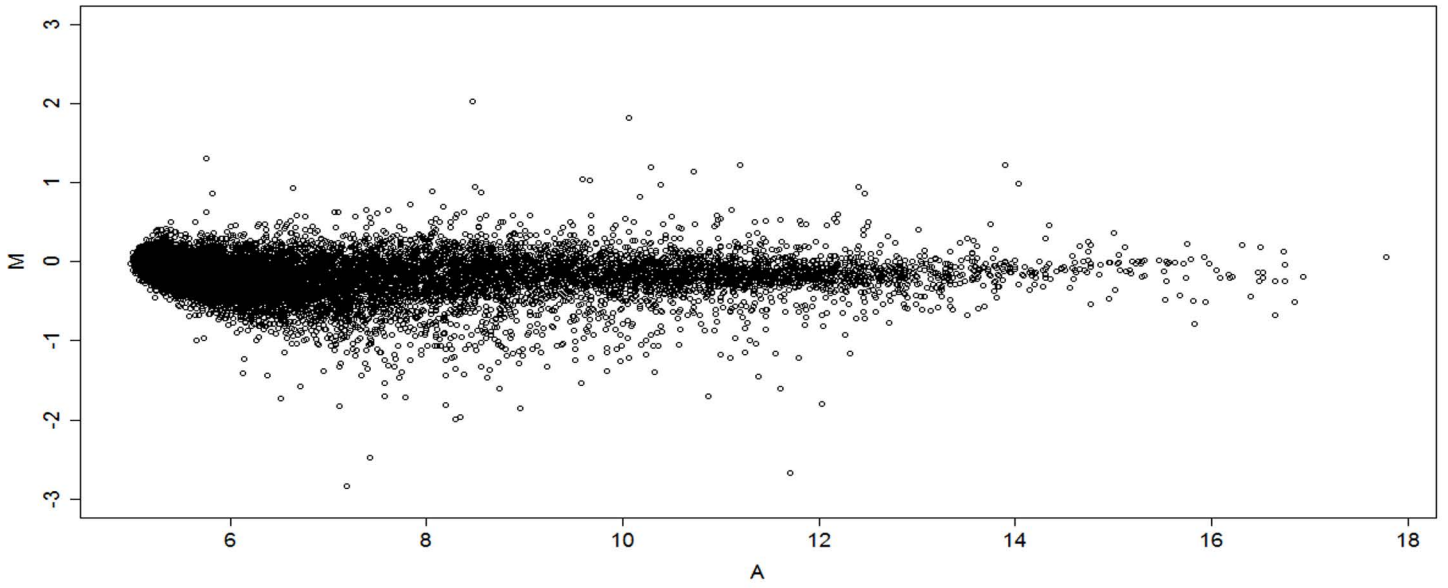**C**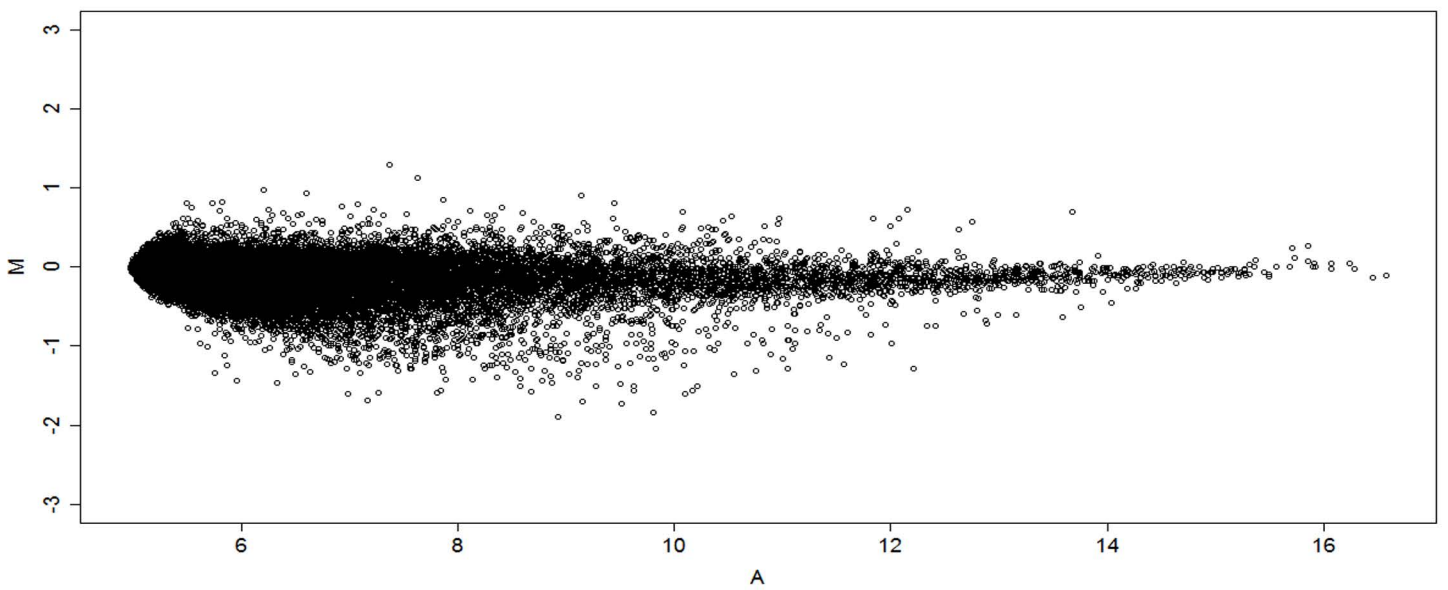

Supplement: 1471-2164-15-302-S8.pdf [file 1471-2164-15-302-S8.pdf]
